# Supplementary material for: Personalized Proteome: Comparing Proteogenomics and Open Variant Search Approaches for Single Amino Acid Variant Detection
Source: PubMed Central journal article supplement — J Proteome Res. 2021 May 17;20(6):3353–64. doi: 10.1021/acs.jproteome.1c00264 (PMC8280751; doi:10.1021/acs.jproteome.1c00264), 2021-05-17
Supplement: pr1c00264_si_001.pdf [file pr1c00264_si_001.pdf]

## Supporting information

"The Personalized Proteome: Comparing Proteogenomics and Open Variant Search Approaches for Single Amino Acid Variant Detection"

Renee Salz<sup>1</sup>, Robbin Bouwmeester<sup>2,3</sup>, Ralf Gabriels<sup>2,3</sup>, Sven Degroeve<sup>2,3</sup>, Lennart Martens<sup>2,3</sup>, Pieter-Jan Volders<sup>2,3</sup>, Peter A.C. 't Hoen<sup>1,\*</sup>

<sup>1</sup>*Centre for Molecular and Biomolecular Informatics, Radboud Institute for Molecular Life Sciences, Radboud University Medical Center, Nijmegen, 6525 GA, The Netherlands*

<sup>2</sup>*VIB-UGent Center for Medical Biotechnology VIB, Technologiepark-Zwijnaarde 75, 9052 Ghent, Belgium*

<sup>3</sup>*Department of Biomolecular Medicine, Ghent University, Technologiepark-Zwijnaarde 75, 9052 Ghent, Belgium*

## Table of contents

- Figure S1. Detailed workflow schematic.
- Figure S2. Distribution of target and decoy variant peptides.
- Figure S3. Annotated variant peptide spectra in mirror plots, with theoretical spectra (as predicted by MS2PIP) in the bottom half for reference.
- Figure S4. Investigation of false negative ('mislabeled') identifications by *ionbot*<sup>TM</sup>
- Table S1: Side-by-side comparison of the contents of the search database
- Table S2. Absolute numbers of PSMs and peptides detected per method.
- PSM zip file
  - Variant PSMs from the Variant-Free search database
  - Variant PSMs from the Variant-Containing search database

- o Reference counterpart PSMs from the Variant-Free search database
- o Reference counterpart PSMs from the Variant-Containing search database

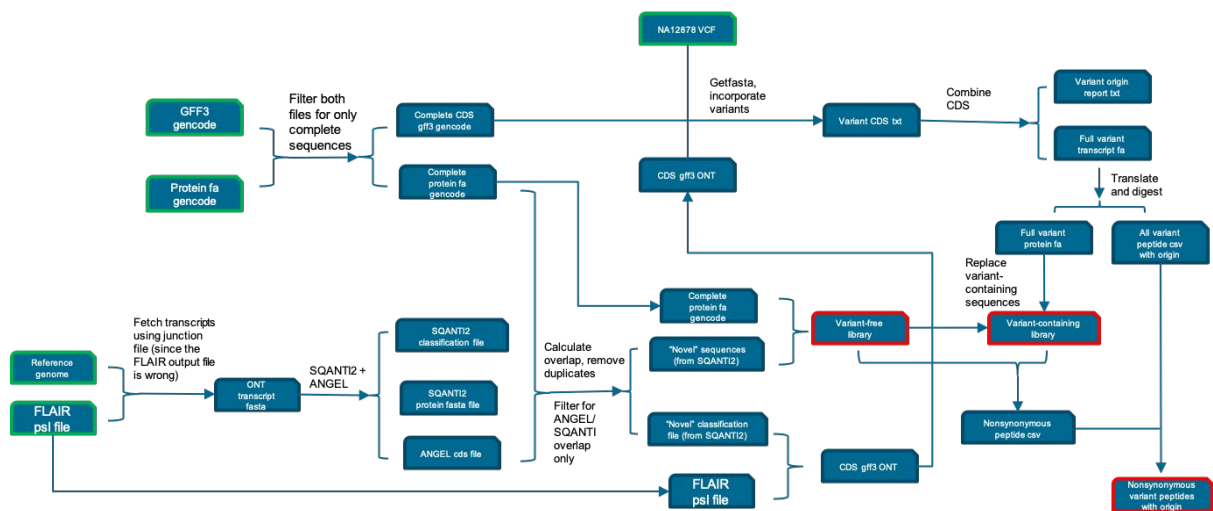

Figure S1. Detailed workflow schematic.

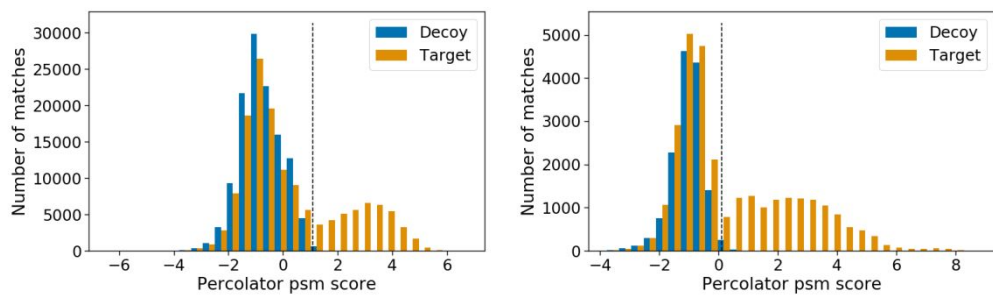

Figure S2. Distribution of target and decoy variant peptides. Variant-containing distribution is on the left, and variant-free is on the right. Separation was made at the dotted line ( $q < 0.01$ ).

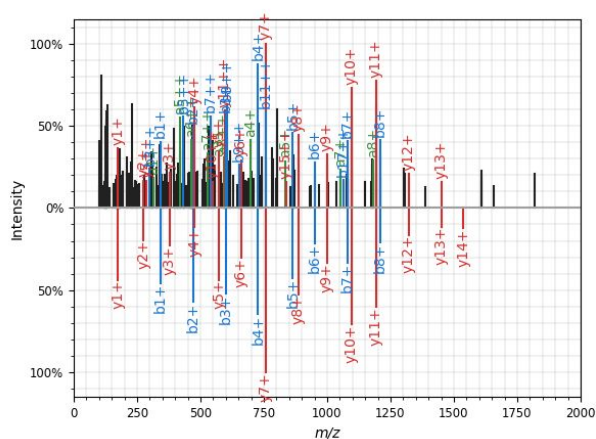

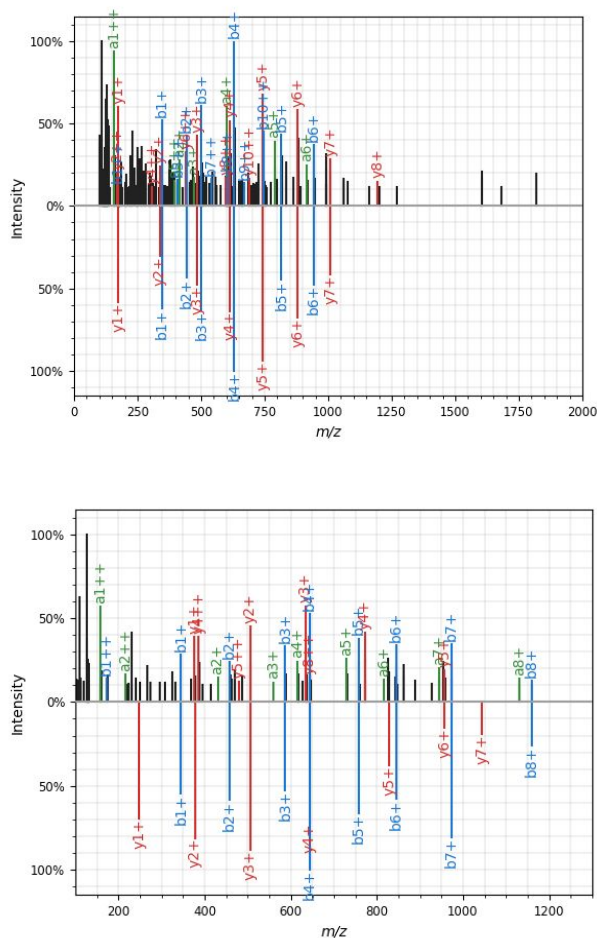

Figure S3. Annotated variant peptide spectra in mirror plots, with theoretical spectra (as predicted by MS2PIP) in the bottom half for reference. Plots made with spectrum\_utils python package. Top: variant peptide LQQQHSEQPPLQPSPVTTR, substitution M  $\rightarrow$  T, on chromosome 1 pos 179882939, scan id Linfeng\_012511\_HapMap39\_6.8739.8739.3. Middle: variant peptide DVGEWQHEEFYR, substitution R  $\rightarrow$  G, on chromosome 16 pos 3674464, scan id Linfeng\_030911\_HapMap46\_2.12742.12742.3. This is one of the peptides where no reference counterparts were detected (while 90 variant peptides were identified). Bottom: variant peptide DLEGLSQWHEEK, substitution W  $\rightarrow$  R, on chromosome 22 pos 36292132, scan id Linfeng\_080711\_HapMap59\_5.15580.15580.3. This is one of the rare variant peptide identifications (AF = 0.001).

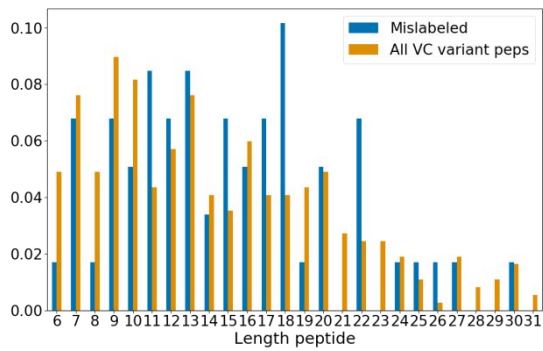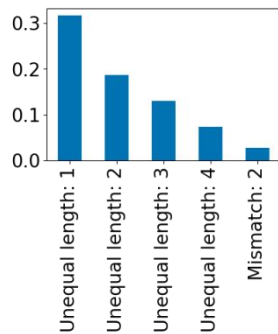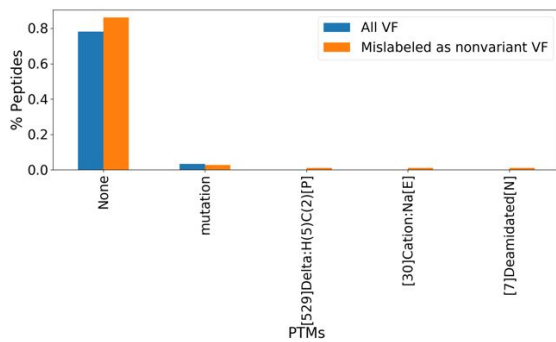

Figure S4. Investigation of false negative ('mislabeled') identifications by *ionbot*<sup>TM</sup>. Top figure shows the density of mislabeled peptides per length, as compared to lengths of all variant peptides identified by the VC method. Middle figure shows the 5 most common causes of misidentification of variant peptides by *ionbot*<sup>TM</sup>. Bottom figure shows unexpected modifications of the false negatives versus the unexpected modifications by all VF identifications. Unlabeled y axes refer to density.

| Search database contents | Sequences in GENCODE | Sequences in the ONT transcriptome | NA12878-specific variants |
|--------------------------|----------------------|------------------------------------|---------------------------|
| <b>ONT</b>               | No                   | Yes                                | No                        |
| <b>Ref</b>               | Yes                  | No                                 | No                        |
| <b>VF</b>                | Yes                  | Yes                                | No                        |
| <b>VC</b>                | Yes                  | Yes                                | Yes                       |

Table S1: Side-by-side comparison of the contents of the search database

|         | ONT       | Ref       | Combi variant-free | Combi variant-containing |
|---------|-----------|-----------|--------------------|--------------------------|
| PSM     | 4,596,878 | 4,606,449 | 4,612,250          | 4,788,215                |
| Peptide | 1,746,226 | 1,767,538 | 1,769,514          | 1,848,787                |

Table S2. Absolute numbers of PSMs and peptides detected per method.
